# Supplementary material
Source: publisher figshare collection journal article supplement (https://rs.figshare.com/ndownloader/files/14026214)
Supplement: Supplementary file 1 [file 14026214]

## Electronic Appendix:

### Kinetics of surface growth with coupled diffusion and the emergence of a universal growth path

---

#### Appendix A - Nomenclature

*General framework:*

|                         |                                                                                                       |
|-------------------------|-------------------------------------------------------------------------------------------------------|
| $\mathcal{R}$           | body manifold in the physical configuration                                                           |
| $\mathcal{R}^R$         | material manifold in the reference configuration                                                      |
| $\partial\mathcal{R}$   | surface boundary of $\mathcal{R}$                                                                     |
| $\partial\mathcal{R}^R$ | surface boundary of $\mathcal{R}^R$                                                                   |
| $\mathcal{S}_a$         | association surface in the physical configuration                                                     |
| $\mathcal{S}_a^R$       | association surface in the reference configuration                                                    |
| $\mathcal{S}_d$         | dissociation surface in the physical configuration                                                    |
| $\mathcal{S}_d^R$       | dissociation surface in the reference configuration                                                   |
| $t$                     | time variable                                                                                         |
| $\mathbf{y}$            | spatial point in the physical configuration                                                           |
| $\mathbf{x}$            | material point in the reference configuration                                                         |
| $\hat{\mathbf{y}}$      | one on one mapping from reference configuration to physical configuration                             |
| $\hat{\mathbf{x}}$      | inverse one on one mapping from physical configuration to reference configuration                     |
| $\mathbf{n}$            | outward pointing normal vector on the boundary $\partial\mathcal{R}$ in the physical configuration    |
| $\mathbf{n}^R$          | outward pointing normal vector on the boundary $\partial\mathcal{R}^R$ in the reference configuration |
| $dV_y$                  | volume element in the physical configuration                                                          |
| $dV_x$                  | volume element in the reference configuration                                                         |
| $dA_y$                  | area element in the physical configuration                                                            |
| $dA_x$                  | area element in the reference configuration                                                           |
| $\mathbf{v}$            | particle velocity in the physical configuration                                                       |
| $\mathbf{V}$            | boundary velocity in the physical configuration                                                       |
| $\mathbf{V}_G$          | growth velocity in the physical configuration                                                         |
| $\mathbf{V}^R$          | boundary velocity in the reference configuration                                                      |
| $\mathbf{j}$            | flux of solvent in the physical configuration                                                         |
| $\mathbf{j}^R$          | flux of solvent in the reference configuration                                                        |
| $\mathbf{F}$            | deformation gradient                                                                                  |
| $J$                     | volume ratio                                                                                          |
| $\phi$                  | physical volume fraction of solvent in the body                                                       |
| $\phi^R$                | referential volume fraction of solvent in the body                                                    |
| $\psi$                  | Helmholtz free energy of the body                                                                     |
| $\psi_e$                | Helmholtz elastic free energy associated with the solid matrix                                        |
| $\psi_s$                | Helmholtz free energy of the solvent                                                                  |
| $\mathbf{T}$            | Cauchy stress tensor                                                                                  |
| $\mathbf{S}$            | Piola stress tensor                                                                                   |
| $\mathbf{b}$            | body forces in the physical configuration                                                             |
| $\mathbf{b}^R$          | body forces in the reference configuration                                                            |
| $p$                     | hydrostatic pressure                                                                                  |
| $\mu$                   | chemical potential of the solvent                                                                     |
| $f$                     | driving force on the boundary                                                                         |
| $\Delta\psi$            | latent energy of growth                                                                               |
| $\mathcal{G}$           | growth function                                                                                       |

*Specific problem:*

|             |                                                   |
|-------------|---------------------------------------------------|
| $k$         | Boltzmann constant                                |
| $T$         | temperature                                       |
| $N$         | number of polymer chains per unit volume          |
| $\nu$       | volume of a solvent unit                          |
| $\chi$      | Flory-Huggins interaction parameter               |
| $D$         | diffusion coefficient                             |
| $b$         | reaction constant                                 |
| $\psi_0$    | free energy of the unmixed solvent                |
| $\psi_a$    | potential energy gain at the association boundary |
| $\lambda_0$ | imposed in-plane stretch                          |

## Appendix B - Rate of Change of Volume

Consider a material volume  $dV_x$  in the reference configuration, and let  $dV_y$  be the volume occupied by this same collection of particles in the current configuration. Recall that  $dV_y = JdV_x$  where  $J = \det \mathbf{F}$ . The standard formula for differentiating the determinant reads

$$\frac{d}{dt} (\det \mathbf{F}) = (\det \mathbf{F}) \operatorname{tr} \left( \frac{d\mathbf{F}}{dt} \mathbf{F}^{-1} \right), \quad (\text{B1})$$

which can alternatively be written as

$$\dot{J} = J \operatorname{tr} \left( \dot{\mathbf{F}} \mathbf{F}^{-1} \right). \quad (\text{B2})$$

Taking the derivative of (2.3)<sup>2</sup>, we can write the relation  $\dot{\mathbf{F}} = \operatorname{grad} \mathbf{v} \mathbf{F}$ . Substituting the latter in (B2), we obtain the identity

$$\dot{J} = J \operatorname{div} \mathbf{v}. \quad (\text{B3})$$

## Appendix C - Explicit Formulae

In the following, we provide the full analytical formulae that have been represented in condensed form in the main text.

The continuity of the chemical potential (6.19) is

$$\ln \left( 1 - \frac{1}{J_d} \right) + \frac{1}{J_d} + \frac{\chi}{J_d^2} + N\nu \left( \frac{J_d}{\lambda_0^4} - \frac{1}{J_d} \right) = 0. \quad (\text{C1})$$

Equation (6.16) that relates the driving force to the swelling ratio can be further developed using (5.1)-(5.3), (5.8), (5.9) and (6.29) to write the driving force at the association boundary as

$$\begin{aligned} f_a(J_a) = \psi_0 + \psi_a - \frac{kT}{\nu} (J_a - 1) \left[ \ln \left( 1 - \frac{1}{J_a} \right) + \frac{\chi}{J_a} \right] - \frac{NkT}{2} \left( \frac{J_a^2}{\lambda_0^4} + 2\lambda_0^2 - 3 - 2 \ln J_a \right) \\ + \left\{ \frac{kT}{\nu} \left[ \ln \left( 1 - \frac{1}{J_a} \right) + \frac{1}{J_a} + \frac{\chi}{J_a^2} \right] + NkT \left( \frac{J_a}{\lambda_0^4} - \frac{1}{J_a} \right) \right\} J_a, \end{aligned} \quad (\text{C2})$$

and at the dissociation boundary as

$$f_d(J_d) = \psi_0 (1 + J_d) - \frac{kT}{\nu} (J_d - 1) \left[ \ln \left( 1 - \frac{1}{J_d} \right) + \frac{\chi}{J_d} \right] - \frac{NkT}{2} \left( \frac{J_d^2}{\lambda_0^4} + 2\lambda_0^2 - 3 - 2 \ln J_d \right). \quad (\text{C3})$$

Substituting (5.10) and (6.30) in (6.45) and (6.46), we can write in the physical space

$$\begin{aligned} y(J) = \frac{\lambda_0^2 D}{b \sinh \left( \frac{\nu}{kT} f_a(J_a) \right)} \left\{ \frac{N\nu}{\lambda_0^4} \left[ \ln \left( \frac{J}{J_a} \right) + \frac{1}{J} - \frac{1}{J_a} \right] - \frac{N\nu}{2} \left( \frac{1}{J^2} - \frac{1}{J_a^2} \right) + \right. \\ \left. \frac{1}{3} (N\nu + 2\chi - 1) \left( \frac{1}{J^3} - \frac{1}{J_a^3} \right) - \frac{\chi}{2} \left( \frac{1}{J^4} - \frac{1}{J_a^4} \right) \right\}, \end{aligned} \quad (\text{C4})$$

and in the reference space

$$X(J) = \frac{\lambda_0^4 D}{b \sinh\left(\frac{\nu}{kT} f_a(J_a)\right)} \left[ \frac{N\nu}{\lambda_0^4} \left( -\frac{1}{J} + \frac{1}{J_a} + \frac{1}{2J^2} - \frac{1}{2J_a^2} \right) - \frac{N\nu}{3} \left( \frac{1}{J^3} - \frac{1}{J_a^3} \right) + \frac{1}{4} (N\nu + 2\chi - 1) \left( \frac{1}{J^4} - \frac{1}{J_a^4} \right) - \frac{2\chi}{5} \left( \frac{1}{J^5} - \frac{1}{J_a^5} \right) \right]. \quad (\text{C5})$$

Analytical expressions for (6.35) and (6.38) can be obtained by replacing  $J$  and  $J_a$  in (C4) and (C5) by  $\tilde{J}$  and  $\tilde{J}_a$ . Notice that the determination of  $J_a$  is required to use the above relations. During the evolution along the universal path, the swelling ratio at the association boundary  $J_a(t)$  can be determined using the implicit equation (6.48). The thicknesses  $\ell$  and  $\ell^R$  of the body in the physical and the reference spaces are obtained by evaluating (C4) and (C5) at  $J = J_d$ .

## Appendix D - Supplementary Figures

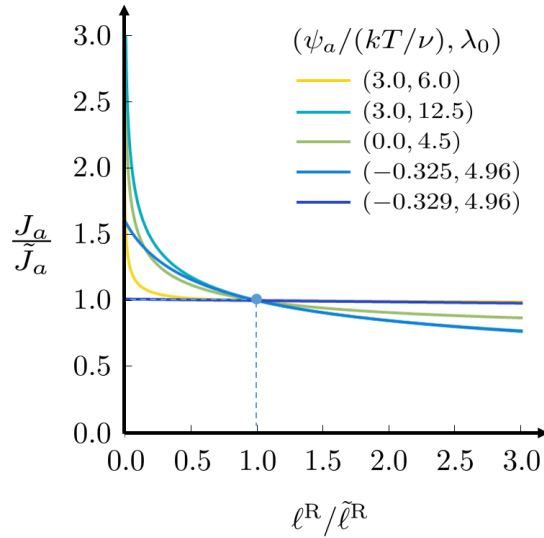

Figure D1: Effect of  $\psi_a$  and  $\lambda_0$  on the universal path. The universal path determined by the numerical simulations is indistinguishable from that given by the analytical formula (6.46).

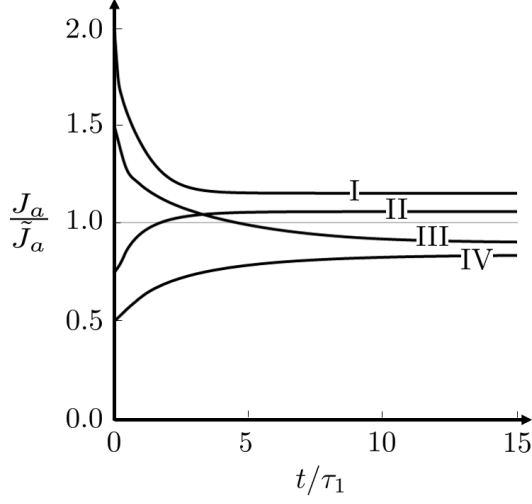

Figure D2: Time evolution of the swelling ratio  $J_a(t) = J(y, t)|_{y=0}$  at the association boundary, during the diffusion-dominated stage for the four paths initiating in regions I-IV in Fig. 5. Time is normalized by  $\tau_1 = 8.2 \times 10^3 \text{s}$ .

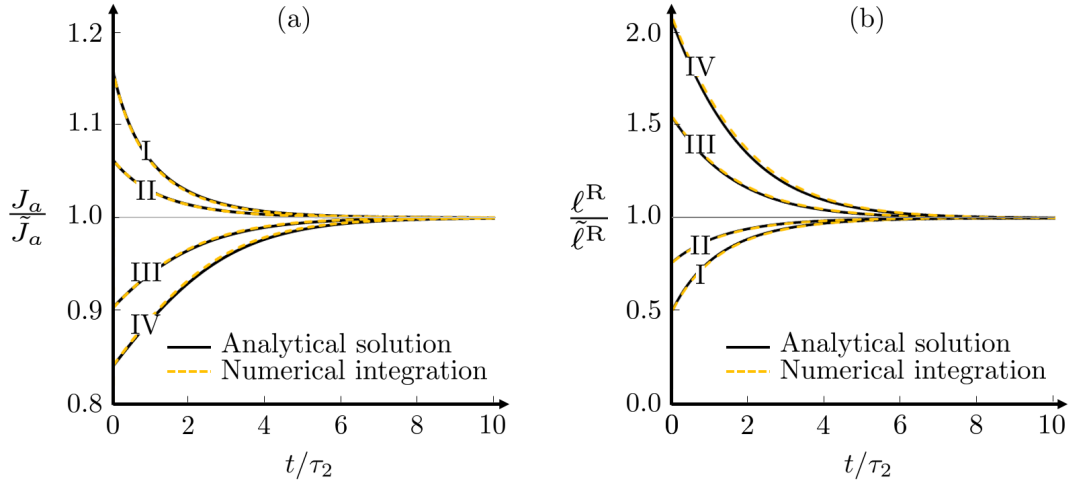

Figure D3: Time evolution of (a) the swelling ratio  $J_a(t)$  and (b) the dry thickness  $\ell^R(t)$  at the association boundary along the universal path for the four initial conditions in regions I-IV shown in Fig. 5. Notice that time has been reset so that  $t = 0$  corresponds to the time at which evolution along the universal path begins. The solid curves correspond to the analytical solution (6.48) and (6.46).
